# Supplementary material for: Bio-conjugated nanoarchitectonics with dual-labeled nanoparticles for a colorimetric and fluorescent dual-mode serological lateral flow immunoassay sensor in detection of SARS-CoV-2 in clinical samples
Source: Royal Society of Chemistry journal article supplement (doi:10.1039/d3ra04373h), 2023-01-01
Supplement: d3ra04373h1.pdf [file d3ra04373h1.pdf]

**Supplementary Information**  
**for**  
**Bio-conjugated Nanoarchitectonics with Dual-labeled  
Nanoparticle for Colorimetric and Fluorescent Dual-mode  
Serological Lateral Flow Immunoassay Sensor in Detection  
of SARS-CoV-2 in Clinical Samples**

Sang Ki Kim,<sup>‡a</sup> Jong Uk Lee,<sup>‡b</sup> Myeong Jin Jeon,<sup>a</sup> Soo-Kyung Kim,<sup>c</sup> Sang-Hyun Hwang,<sup>d</sup> Min Eui Hong<sup>e</sup> and Sang Jun Sim<sup>\*a</sup>

<sup>a</sup>. Department of Chemical and Biological Engineering, Korea University, 145, Anam-ro, Seongbuk-gu, Seoul, 02841, Republic of Korea.

<sup>b</sup>. Department of Chemical Engineering, Suncheon National University, 225 Jungang-ro, Suncheon, Jeollanam-do, 57922, Republic of Korea

<sup>c</sup>. Department of Laboratory Medicine, Ewha Womans University Mokdong Hospital, Seoul, 07985, Republic of Korea

<sup>d</sup>. Department of Laboratory Medicine, Asan Medical Center, University of Ulsan College of Medicine, Seoul, 05505, Republic of Korea

<sup>e</sup>. Business Development, Kyung Nam Pharm.Co.,Ltd, 702 Eonju-ro, Gangnam-gu, Seoul, 06061, Republic of Korea

<sup>‡</sup>These authors contributed equally to this work.

<sup>\*</sup>Authors to whom correspondence should be addressed: [simsj@korea.ac.kr](mailto:simsj@korea.ac.kr)

## Supplementary Methods

### Optimization of the dual-labeled nanoprobes

The concentration of Cy3-labeled thiolated PEG, pH of the colloidal gold solution, and concentration of SARS-CoV-2 antigens are essential for stabilizing the dual-labeled nanoprobe and sensitivity of MEF based dual-mode LFIA sensor. The concentration of Cy3-labeled thiolated PEG was optimized as follows: Different volumes of Cy3-PEG-SH (200 µg/mL) from 5 µL to 100 µL were added to 1mL of gold solution (0.22 nM) and incubated overnight. After centrifugation, the probe showing gray color (from 35 µL to 100 µL) was removed. Then 10 µL of each Cy3-labeled AuNPs (0.025 nM) were dried on the conjugate pad with running buffer loaded. After taking out an assay that did not flow, the remaining nanoprobes were placed in the wells of a 96-well microplate. Subsequently, fluorescence intensity was measured by a microplate reader (Tecan, GENios).

The optimal pH of the colloidal gold solution and concentration of the SARS-CoV-2 antigen was determined using the T/C ratio of the colorimetric assay. To optimize the pH of the gold solution, the pH varied from 5 to 11. An identical amount of SARS-CoV-2 antigen was then added to each gold solution. The mixture was incubated for 20 min at room temperature with vigorous stirring. After centrifugation, each nanoprobe was dried on a conjugate pad with the loaded sample buffer. The T/C ratio of the colorimetric signal was evaluated using ImageJ. Optimization of the concentration of SARS-CoV-2 antigen was conducted in the same way as pH optimization, with the volume ranging from 1 µL to 24 µL.

### Selection of chemical buffer for pre-treatment of the strips and running buffer

Pretreatment of the conjugate pads and optimization of the running buffer is essential for the optimal release and stability of the nanoprobes. Pretreatment of the conjugate pad was prepared as follows: (1) borate buffer (10 mM, pH 7.4) containing 0.05% (v/v) Tween-20 with 0%, 1%, 2% (w/v) BSA; (2) borate buffer (10 mM, pH 7.4) containing 0.05% (v/v) Tween-20 with 0%, 1%, 2% (w/v) BSA, 5%, 10%, 20% (w/v) sucrose; (3) PBS (10 mM, pH 7.4) containing 0.05% (v/v) Tween-20 with 0%, 1%, 2% (w/v) BSA; and (4) PBS (10 mM, pH 7.4) containing 0.05% (v/v) Tween-20 with 0%, 1%, 2% (w/v) BSA and 5%, 10%, 20% (w/v) sucrose. Conjugate pads were soaked in the buffer for 1 h. Additionally, the dual-labeled nanoprobes were loaded onto the conjugate pad and dried for 1 h. Upon optimizing the adequate buffer for pretreatment, the nanoprobes on the conjugate pad soaked in PBS buffer turned gray. Simultaneously, fluorescence signals could not be observed due to aggregation. When a buffer containing 2% (w/v) BSA and 20% (w/v) sucrose was used, the flow of the assay could not be observed because the nanoprobes were stocked on the conjugate pad. Finally, by observing the lateral flow speed and signal intensity, borate buffer (10 mM, pH 7.4) containing 0.05% (v/v) Tween-20, 1% (w/v) BSA, and 10% (w/v) sucrose was selected as the optimal buffer for pre-treating the conjugate pad. In addition, the running buffer was optimized with different concentration of Tween-20 (v/v) in PBS to achieve a smooth flow. The running buffer containing 0.5% (v/v) Tween-20 exhibited excellent performance, demonstrating the highest

color contrast signals on the test lines.

### **Comparison of various types of SARS-CoV-2 antigen-antibody interactions**

Five different types of SARS-CoV-2 antigens (N, S, S1, S2, S-RBD) were incubated with Cy3 labeled thiolated PEG conjugated AuNPs to compare the affinity of each protein. After fabricating 5 different dual-labeled nanoprobe, the specificity and the sensitivity were evaluated by measuring RPI using ImageJ. (Fig. S2 & S3). Since nucleocapsid protein is more stable than spike protein from mutations, nucleocapsid antigen-conjugated dual-labeled nanoprobe only bound to nucleocapsid antibodies demonstrating excellent specificity. In contrast, spike and spike subunits cross-react with each other showing little peak intensity. In addition, nucleocapsid protein conjugated dual-labeled nanoprobe-based LFIA sensor showed the highest sensitivity by detecting corresponding antibodies as low as 1 ng/mL, followed by spike RBD, Spike, S2, and S1.

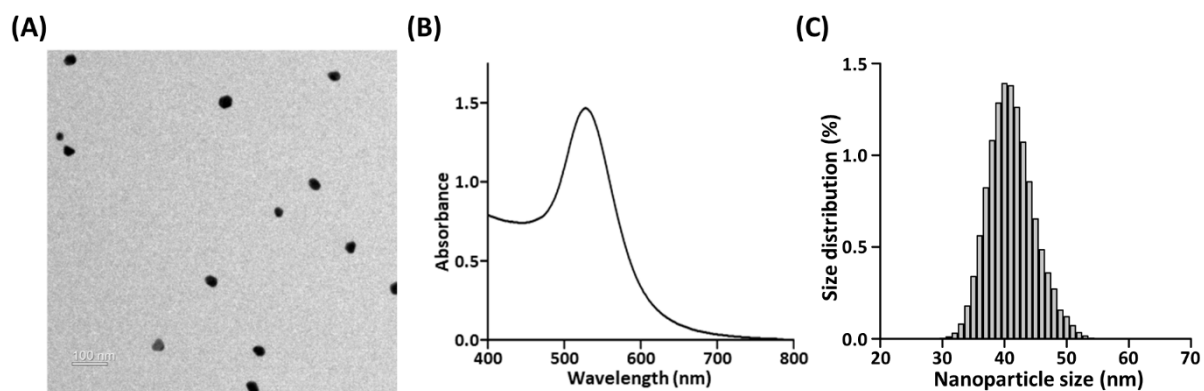

**Fig. S1** Characterization of AuNPs. (A) TEM image, (B) UV-vis spectra, and (C) NTA measurement of size distribution.

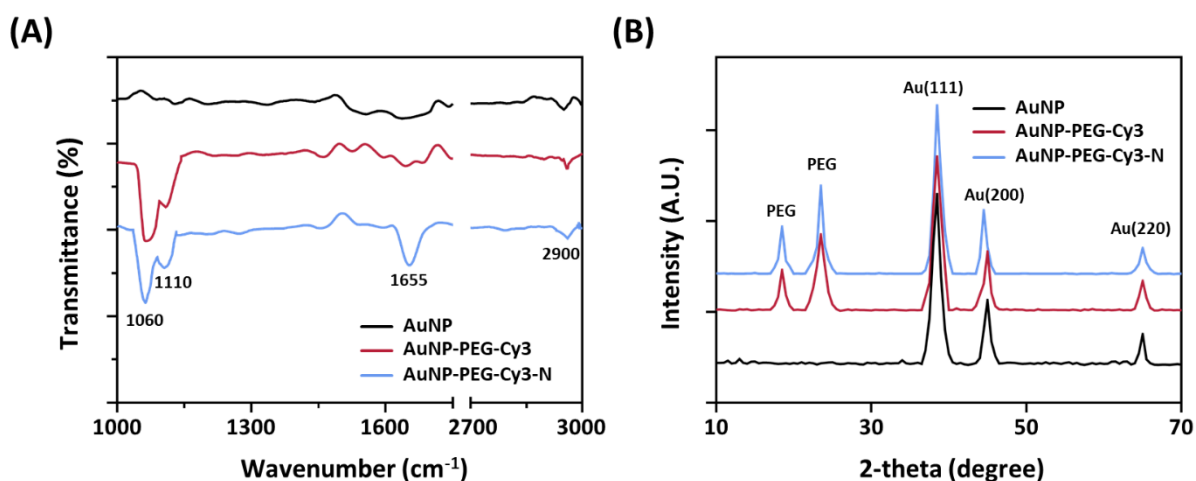

**Fig. S2** Characterization of nanoprobe. (A) FT-IR spectrum and (B) XRD spectrum of AuNPs modified with Cy3 and SARS-CoV-2 N antigen.

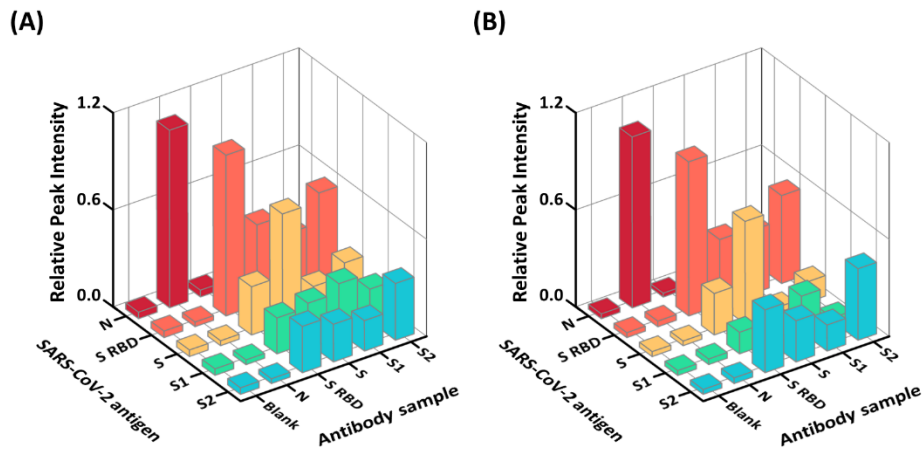

**Fig. S3** Comparison of 5 different SARS-CoV-2 antigen-antibody affinities by measuring specificity. (A) Colorimetric signal intensity and (B) Fluorescence signal intensity.

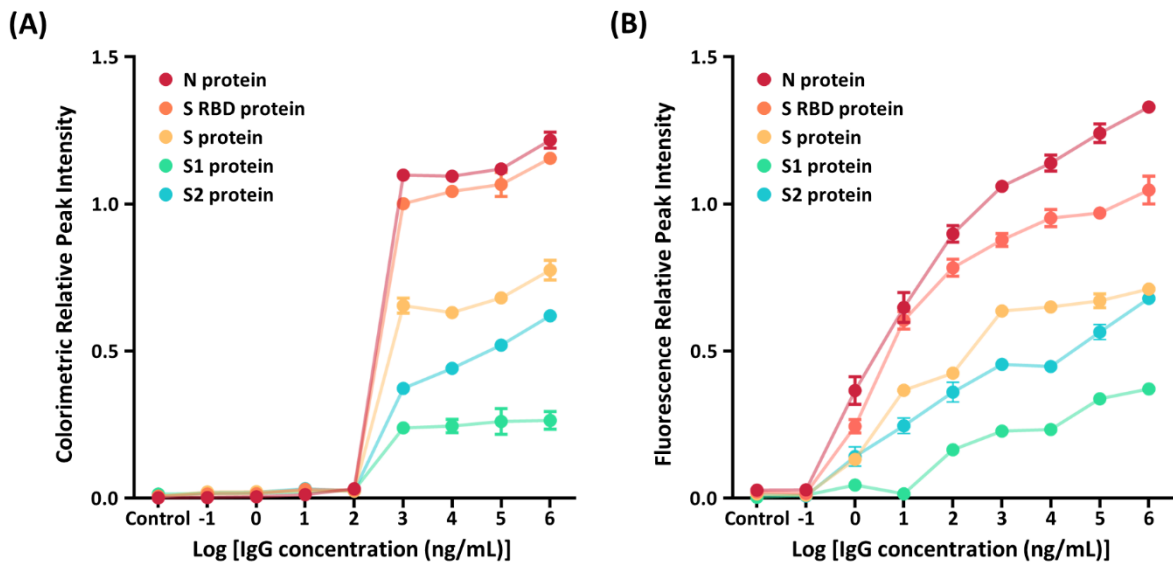

**Fig. S4** Comparison of 5 different SARS-CoV-2 antigen-antibody affinities by measuring sensitivity. (A) Colorimetric signal intensity and (B) Fluorescence signal intensity.

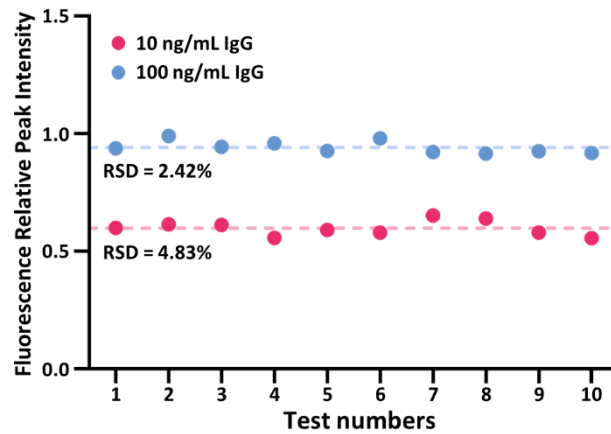

**Fig. S5** Reproducibility of fluorescence signals for 100 ng/mL and 10 ng/mL IgG concentrations.

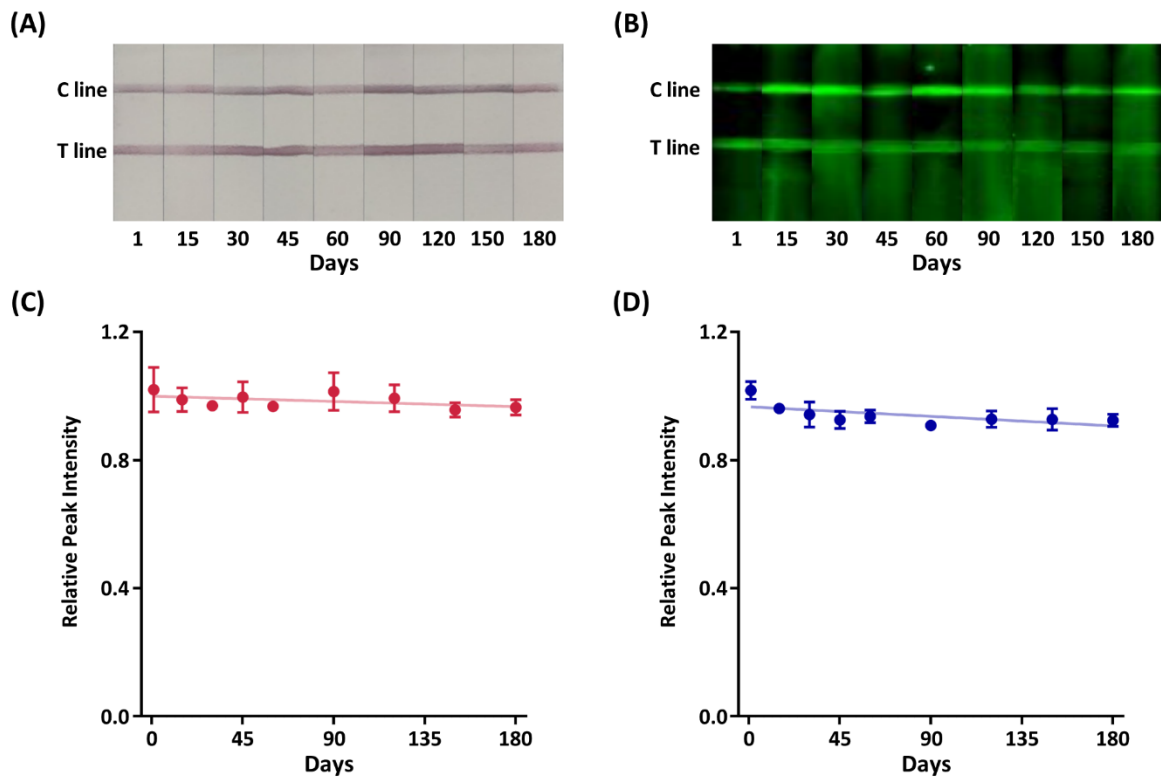

**Fig. S6** Stability tests of the MEF-based dual-mode serological LFIA. Each strip was stored at room temperature for a period of 1-180 days. (A and B) Colorimetric images fluorescent images of each test, (C and D) Relative peak intensity of color and fluorescence signals of each test. Error bars indicate the standard deviation from three independent experiments.



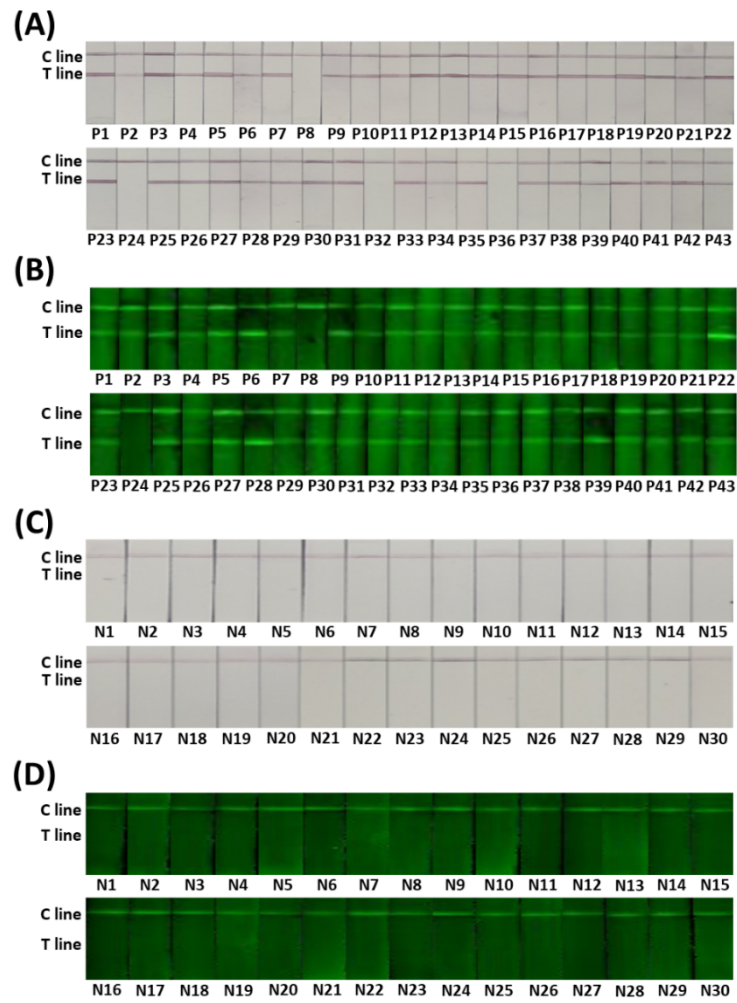

**Fig. S7** MEF-based dual-mode serological LFIA with 73 clinical samples. (A) Colorimetric and (B) fluorescent images of 43 serum samples of patients. (C) Colorimetric and (D) fluorescent images of 30 negative serum samples.



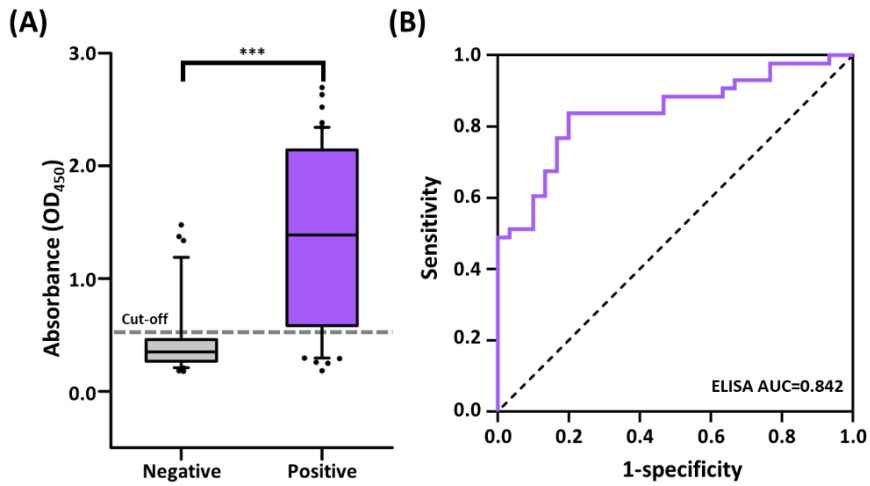

**Fig. S8** ELISA with 73 clinical serum samples: 43 COVID-19 positive serum and 30 negative serum samples (A) scatter plot of 43 COVID-19 positive serum and 30 negative serum samples. \*\*\* $p < 0.0001$ . (B) ROC curve analysis of 73 serum samples to assess the detection capacity of the ELISA.

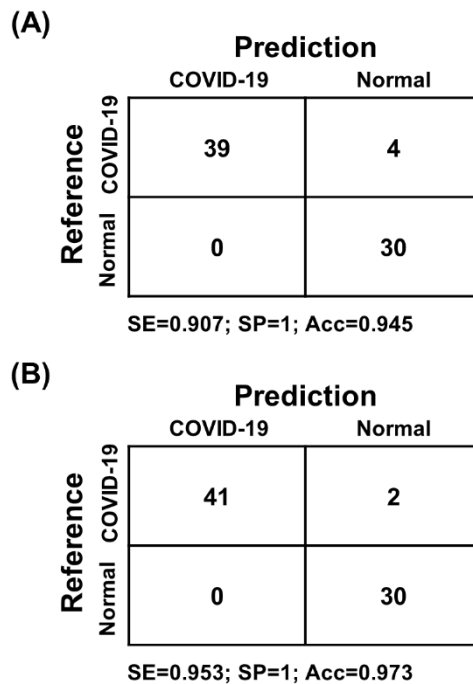

**Fig. S9** Confusion matrix of (A) colorimetric and (B) fluorescent assay of MEF-based dual-mode serological LFIA sensor. SE, sensitivity; SP, specificity; Acc, accuracy.

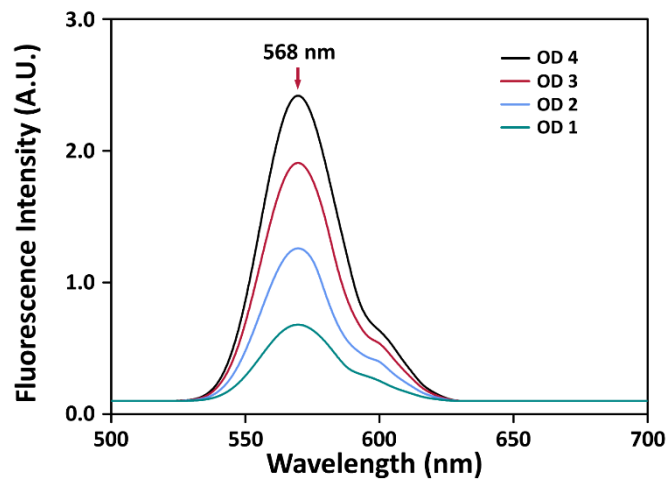

**Fig. S10** Representative fluorescence spectrum of nanoprobe with different OD.

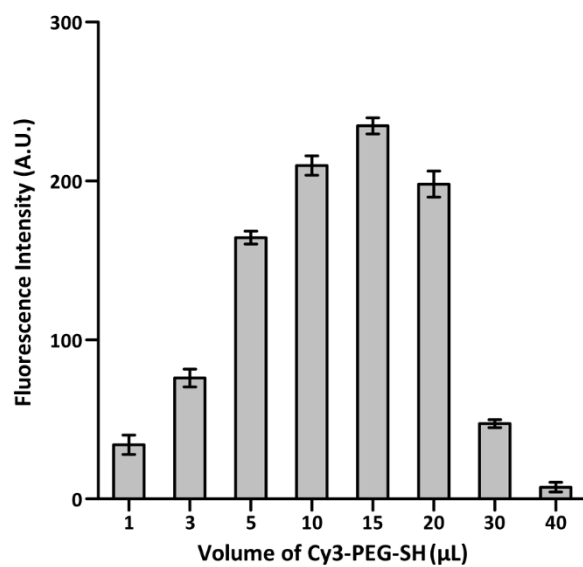

**Fig. S11** Optimizing the concentration of Cy3-PEG-SH on 40 nm AuNPs.

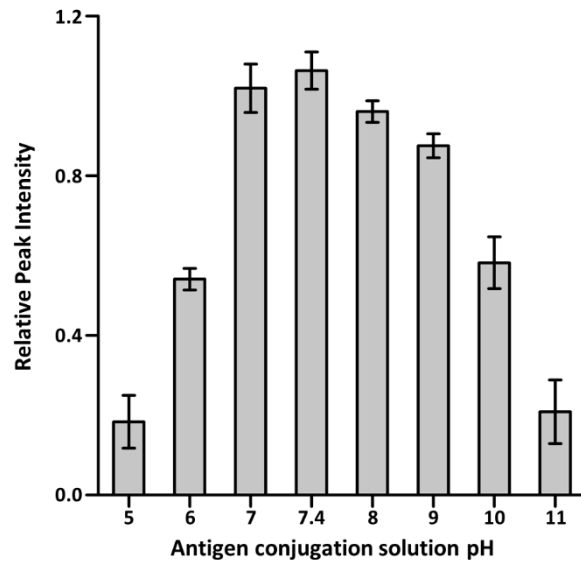

Fig. S12 Optimizing pH of solution for SARS-CoV-2 antigen conjugation.

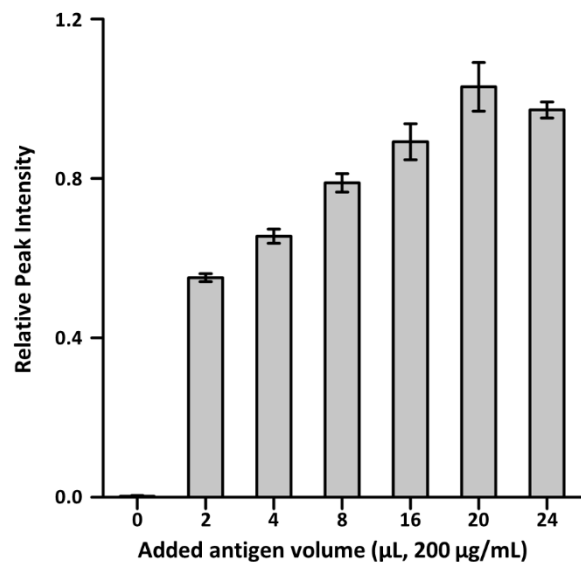

Fig. S13 Optimizing the concentration of SARS-CoV-2 antigen for fabrication of nanoprobe.

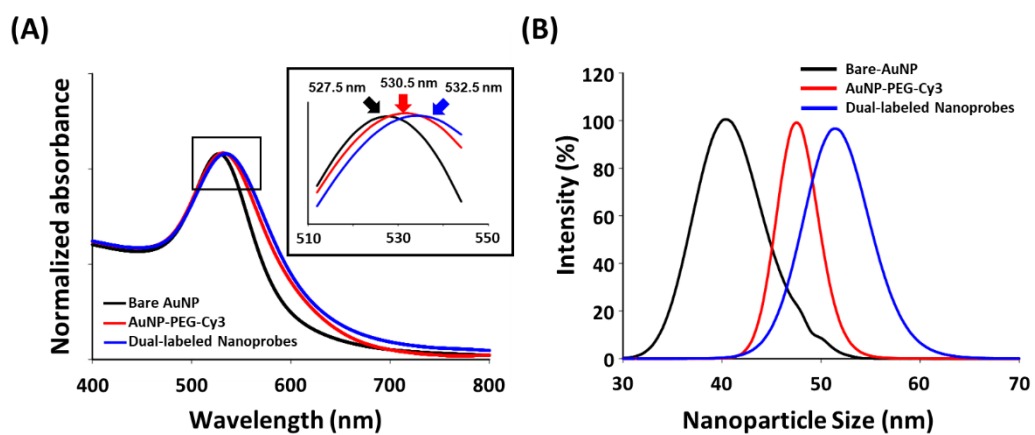

**Fig. S14** Characterization of nanoprobes. (A) UV-Vis spectra of bare AuNPs, Cy3-PEG conjugated AuNPs and dual-labeled nanoprobes. (B) Size distribution of bare AuNPs, Cy3-PEG conjugated AuNPs, and dual-labeled nanoprobes measured by NTA.

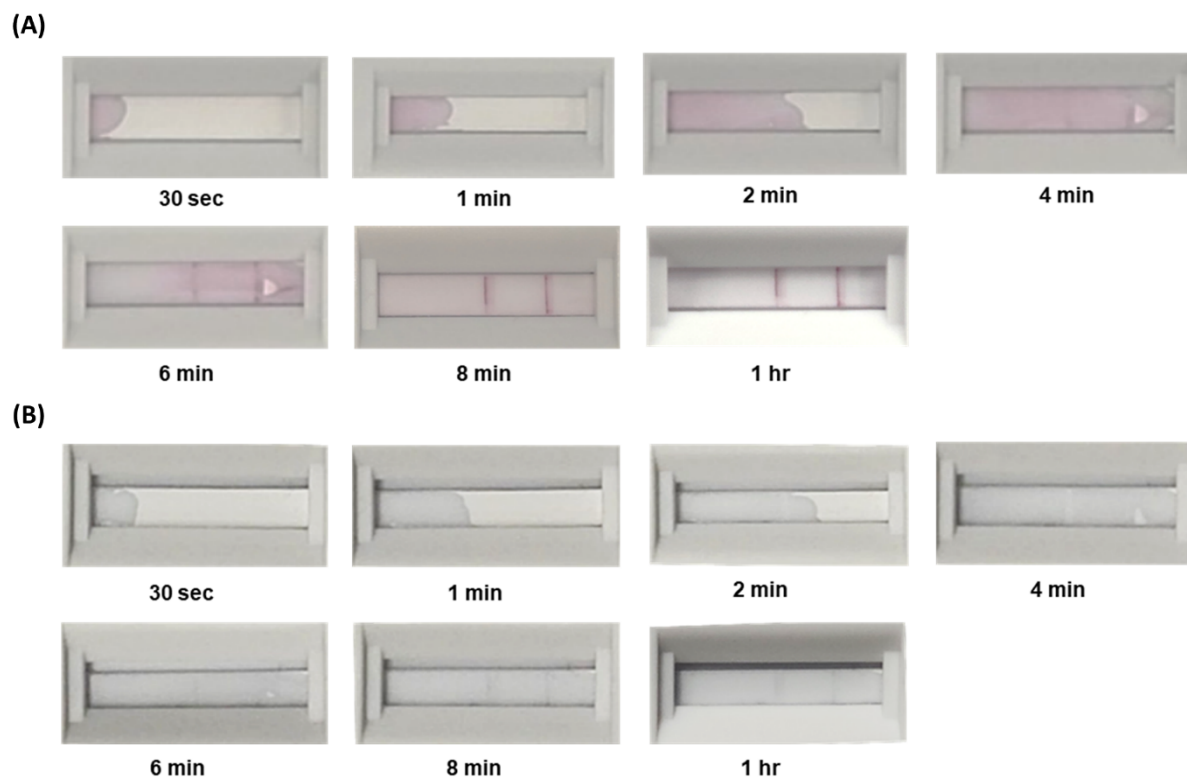

**Fig. S15** Consecutive images of colorimetric LFIA after loading a positive sample (1  $\mu\text{g}/\text{mL}$  anti-N IgG). (A) Appearance of colorimetric signal within 8 minutes when nanoprobe are stable. (B) Aggregated nanoprobe cannot flow along with the sample, showing no visible lines.

**Table S1.** A comparison of the MEF-based dual-mode LFIA sensor with the recently reported assay of serological SARS-CoV-2 detection.

| Samples          | Analytes    | Method                        | Detection time [min] | Limit of detection                     | Sensitivity [%]      | Specificity [%] | Ref.      |
|------------------|-------------|-------------------------------|----------------------|----------------------------------------|----------------------|-----------------|-----------|
| Serum            | IgM and IgG | Fluorescence                  | 10                   | 0.236 µg/ml (IgM)<br>0.125 µg/ml (IgG) | 78 (IgM)<br>95 (IgG) | /               | (1)       |
| Serum            | IgG         | Colorimetric                  | 15-20                | 0.8 mg/ml                              | 69.1                 | 100             | (2)       |
| Human blood      | IgM and IgG | Fluorescence                  | 15                   | 48.84 ng/ml                            | 88.7                 | 90.6            | (3)       |
| Serum and blood  | IgM and IgG | Colorimetric                  | 10                   | 20 ng/ml (IgM)<br>5 ng/ml (IgG)        | 93.33                | 97.34           | (4)       |
| Serum            | IgM and IgG | Colorimetric                  | 10                   | 60 ng/ml (IgM)<br>20 ng/ml (IgG)       | 94.74                | 96.23           | (5)       |
| Serum            | IgM and IgG | Colorimetric                  | /                    | /                                      | 88.56                | 97.42           | (6)       |
| Serum and plasma | IgM and IgG | Colorimetric                  | 10-15                | 0.8 µg/ml (IgM)<br>0.6 µg/ml (IgG)     | 90                   | 96.6            | (7)       |
| Serum            | IgG         | Fluorescence                  | 8                    | 48.84 ng/ml                            | /                    | /               | (8)       |
| Serum            | IgM and IgG | Fluorescence                  | 15                   | /                                      | 97.37                | 95.54           | (9)       |
| Serum            | IgG         | Colorimetric/<br>Fluorescence | 8                    | 1 ng/ml                                | 95.3                 | 100             | This work |

**Table S2.** Clinical sample information of the COVID-19 patients.

| Patient No. | Gender | Age | Sample acquisition date (yyymmdd) | Dual-mode LFIA (Color) | Dual-mode LFIA (Fluorescent) |
|-------------|--------|-----|-----------------------------------|------------------------|------------------------------|
| P1          | Female | 77  | 210512                            | +                      | +                            |
| P2          | Female | 70  | 210427                            | +                      | +                            |
| P3          | Male   | 50  | 210529                            | +                      | +                            |
| P4          | Male   | 82  | 210519                            | +                      | +                            |
| P5          | Male   | 61  | 210517                            | +                      | +                            |
| P6          | Female | 26  | 210606                            | +                      | +                            |
| P7          | Male   | 44  | 210807                            | +                      | +                            |
| P8          | Male   | 35  | 210815                            | -                      | -                            |
| P9          | Male   | 66  | 210804                            | +                      | +                            |
| P10         | Male   | 70  | 210807                            | +                      | +                            |
| P11         | Female | 75  | 210823                            | +                      | +                            |
| P12         | Female | 68  | 210824                            | +                      | +                            |
| P13         | Female | 93  | 210824                            | +                      | +                            |
| P14         | Male   | 36  | 210808                            | +                      | +                            |
| P15         | Male   | 47  | 210829                            | +                      | +                            |
| P16         | Female | 66  | 220228                            | +                      | +                            |
| P17         | Female | 75  | 220228                            | +                      | +                            |
| P18         | Male   | 91  | 220228                            | +                      | +                            |
| P19         | Female | 56  | 220228                            | +                      | +                            |
| P20         | Male   | 48  | 220228                            | +                      | +                            |
| P21         | Male   | 73  | 220228                            | +                      | +                            |
| P22         | Female | 71  | 220428                            | +                      | +                            |
| P23         | Male   | 65  | 220428                            | +                      | +                            |
| P24         | Male   | 78  | 220428                            | -                      | -                            |
| P25         | Female | 92  | 220428                            | +                      | +                            |
| P26         | Male   | 78  | 220504                            | +                      | +                            |
| P27         | Female | 63  | 220428                            | +                      | +                            |

|     |        |    |        |   |   |
|-----|--------|----|--------|---|---|
| P28 | Male   | 80 | 220428 | + | + |
| P29 | Male   | 53 | 220429 | + | + |
| P30 | Male   | 82 | 220425 | + | + |
| P31 | Male   | 63 | 220501 | + | + |
| P32 | Female | 62 | 220428 | - | + |
| P33 | Male   | 94 | 220428 | + | + |
| P34 | Male   | 76 | 220428 | + | + |
| P35 | Male   | 87 | 220504 | + | + |
| P36 | Male   | 89 | 220503 | - | + |
| P37 | Male   | 45 | 220428 | + | + |
| P38 | Female | 68 | 220504 | + | + |
| P39 | Female | 51 | 220428 | + | + |
| P40 | Female | 27 | 220427 | + | + |
| P41 | Male   | 88 | 220429 | + | + |
| P42 | Female | 61 | 220429 | + | + |
| P43 | Male   | 65 | 220427 | + | + |

---



## Supplementary Reference

- [1] R. Chen, C. Ren, M. Liu, X. Ge, M. Qu, X. Zhou, M. Liang, Y. Liu and F. Li, *ACS Nano*, 2021, **15**, 8996.
- [2] T. Wen, C. Huang, F.-J. Shi, X.-Y. Zeng, T. Lu, S.-N. Ding and Y.-J. Jiao, *Analyst*, 2020, **145**, 5345.
- [3] Z. Li, Y. Yi, X. Luo, N. Xiong, Y. Liu, S. Li, R. Sun, Y. Wang, B. Hu and W. Chen, *J. Med. Virol.*, 2020, **92**, 1518.
- [4] Z. Wang, Z. Zheng, H. Hu, Q. Zhou, W. Liu, X. Li, Z. Liu, Y. Wang and Y. Ma, *Lab Chip*, 2020, **20**, 4255.
- [5] C. Chen, H. Hu, X. Li, Z. Zheng, Z. Wang, X. Wang, P. Zheng, F. Cui, G. Li and Y. Wang, *IEEE Trans. Nanobiosci.*, 2021, **21**, 37.
- [6] K. Li, C. Tong, X. Ha, C. Zeng, X. Chen, F. Xu, J. Wang, H. Du, Y. Chen and J. Cai, *BMC Infect. Dis.*, 2021, **21**, 860.
- [7] A. Ahmadi, Z. Mirzaeizadeh and K. Omidfar, *Monoclon. Antibodies Immunodiagn. Immunother.*, 2021, **40**, 210.
- [8] Z. Li, A. Wang, J. Zhou, Y. Chen, H. Liu, Y. Liu, Y. Zhang, P. Ding, X. Zhu and C. Liang, *Int. J. Mol. Sci.*, 2022, **23**, 6225.
- [9] C. Wang, D. Shi, N. Wan, X. Yang, H. Liu, H. Gao, M. Zhang, Z. Bai, D. Li, E. Dai, Z. Rong, S. Wang, *Analyst*, 2021, **146**, 3908.
